# Supplementary material for: Unsolved Issues in Thymic Epithelial Tumour Stage Classification: The Role of Tumour Dimension
Source: MDPI journal article supplement (doi:10.3390/diagnostics13223468), 2023-11-17
Supplement: s1 [file s1]

| N infiltrated organs | Lwr   | Upr   | p-value | p-value Adj |
|----------------------|-------|-------|---------|-------------|
| 1-0                  | -0.36 | -1.82 | 1.13    | 0.91        |
| 2-0                  | 0.89  | -0.95 | 2.74    | 0.59        |
| <b>3-0</b>           | 3.93  | 0.21  | 7.65    | <b>0.03</b> |
| 2-1                  | 1.25  | -1.01 | 3.53    | 0.48        |
| <b>3-1</b>           | 4.29  | 0.33  | 8.24    | <b>0.02</b> |
| 3-2                  | 3.03  | -1.07 | 7.14    | 0.22        |

**Table S1:** Tukey HSD analysis for number of infiltrated organs.

|                                    | Coef   | Exp<br>(Coef) | Lower<br>95% CI | Upper<br>95% CI | SE<br>(Coef) | Robust-<br>SE | z-test | Pr(> z )        |
|------------------------------------|--------|---------------|-----------------|-----------------|--------------|---------------|--------|-----------------|
| Continuous variable                | 0.04   | 1.04          | 0.94            | 1.15            | 0.07         | 0.05          | 0.83   | 0.40            |
| Number of<br>Organs Infiltrated: 1 | 1.39   | 4.04          | 3.22            | 5.05            | 0.78         | 0.11          | 12.2   | <b>&lt;0.01</b> |
| Number of<br>Organs Infiltrated: 2 | 1.67   | 5.32          | 2.66            | 10.67           | 0.93         | 0.35          | 4.72   | <b>&lt;0.01</b> |
| Number of<br>Organs Infiltrated: 3 | 2.43   | 11.41         | 8.17            | 15.93           | 1.37         | 0.17          | 14.29  | <b>&lt;0.01</b> |
| pTNM: pt2                          | 0.2    | 1.22          | 0.16            | 8.91            | 1.01         | 1.01          | 0.2    | 0.84            |
| pTNM: pt3                          | -0.26  | 0.76          | 0.14            | 4.1             | 1.1          | 0.85          | -0.31  | 0.75            |
| Masaoka                            | 0.51   | 1.67          | 0.42            | 6.66            | 0.45         | 0.7           | 0.73   | 0.46            |
| cut off 5 cm                       | -0.24  | 0.78          | 0.29            | 2.09            | 0.45         | 0.5           | -0.49  | 0.62            |
| Number of<br>Organs Infiltrated: 1 | 1.31   | 3.73          | 3.46            | 4.02            | 0.77         | 0.03          | 34.39  | <b>&lt;0.01</b> |
| Number of<br>Organs Infiltrated: 2 | 1.53   | 4.62          | 1.45            | 14.75           | 0.91         | 0.59          | 2.58   | <b>0.009</b>    |
| Number of<br>Organs Infiltrated: 3 | 2.57   | 13.19         | 11.85           | 14.68           | 1.36         | 0.05          | 47.35  | <b>&lt;0.01</b> |
| pTNM: pT2                          | 0.41   | 1.5           | 0.1             | 21.6            | 1.01         | 1.35          | 0.3    | 0.76            |
| pTNM: pT3                          | -0.003 | 0.99          | 0.08            | 11.82           | 1.05         | 1.26          | -0.002 | 0.99            |
| Masaoka                            | 0.48   | 1.62          | 0.38            | 6.76            | 0.44         | 0.72          | 0.66   | 0.51            |
| cut off 3 cm                       | 0.46   | 1.59          | 0.77            | 3.29            | 0.76         | 0.36          | 1.26   | 0.21            |
| Number of<br>Organs Infiltrated: 1 | 1.38   | 4             | 3.64            | 4.38            | 0.78         | 0.04          | 29.48  | <b>&lt;0.01</b> |
| Number of<br>Organs Infiltrated: 2 | 1.62   | 5.06          | 2               | 12.76           | 0.92         | 0.47          | 3.44   | <b>&lt;0.01</b> |
| Number of<br>Organs Infiltrated: 3 | 2.53   | 12.57         | 11.37           | 13.9            | 1.36         | 0.05          | 49.39  | <b>&lt;0.01</b> |
| pTNM: pT2                          | 0.2    | 1.22          | 0.14            | 10.27           | 1.01         | 1.08          | 0.18   | 0.84            |
| pTNM: pT3                          | -0.18  | 0.82          | 0.11            | 5.79            | 1.06         | 0.99          | -0.18  | 0.85            |
| Masaoka                            | 0.48   | 1.62          | 0.39            | 6.71            | 0.44         | 0.72          | 0.67   | 0.51            |

**Table S2:** Multivariable model for disease free survival

|                                    | Coef  | Exp<br>(Coef) | Lower<br>95% CI | Upper<br>95% CI | SE<br>(Coef) | Robust-SE | z-test | Pr(> z ) |
|------------------------------------|-------|---------------|-----------------|-----------------|--------------|-----------|--------|----------|
| Continuous variable                | 0.04  | 1.04          | 0.94            | 1.15            | 0.07         | 0.05      | 0.83   | 0.40     |
| Number of<br>Organs Infiltrated: 1 | 1.39  | 4.04          | 3.22            | 5.05            | 0.78         | 0.11      | 12.20  | <0.01    |
| Number of<br>Organs Infiltrated: 2 | 1.67  | 5.32          | 2.66            | 10.67           | 0.93         | 0.35      | 4.72   | <0.01    |
| Number of<br>Organs Infiltrated: 3 | 2.43  | 11.41         | 8.17            | 15.93           | 1.37         | 0.17      | 14.29  | <0.01    |
| PTNM: t2                           | 0.20  | 1.22          | 0.16            | 8.91            | 1.01         | 1.01      | 0.21   | 0.84     |
| PTNM: t3                           | -0.26 | 0.76          | 0.14            | 4.10            | 1.10         | 0.85      | -0.31  | 0.75     |
| Masaoka                            | 0.51  | 1.67          | 0.42            | 6.66            | 0.45         | 0.70      | 0.73   | 0.46     |
|                                    |       |               |                 |                 |              |           |        |          |
|                                    | Coef  | Exp(Coef)     | Lower<br>95% CI | Upper<br>95% CI | SE<br>(Coef) | Robust-SE | z-test | Pr(> z ) |
| Cut off 5 cm                       | -0.29 | 0.74          | 0.64            | 0.86            | 0.54         | 0.07      | -3.85  | <0.01    |
| Number of<br>Organs Infiltrated: 1 | 1.57  | 4.84          | 3.59            | 6.53            | 0.88         | 0.15      | 10.33  | <0.01    |
| Number of<br>Organs Infiltrated: 2 | 1.91  | 6.78          | 3.15            | 14.56           | 1.02         | 0.38      | 4.91   | <0.01    |
| Number of<br>Organs Infiltrated: 3 | 3.25  | 25.86         | 15.51           | 43.14           | 1.46         | 0.26      | 12.46  | <0.01    |
| pTNM: pT2                          | 0.90  | 2.46          | 0.55            | 10.84           | 1.21         | 0.75      | 1.192  | 0.23     |
| pTNM: pT3                          | 0.63  | 1.88          | 1.39            | 2.55            | 1.27         | 0.15      | 4.101  | <0.01    |
| Masaoka                            | -0.17 | 0.84          | 0.42            | 1.68            | 0.56         | 0.35      | -0.481 | 0.63     |
|                                    |       |               |                 |                 |              |           |        |          |
|                                    | Coef  | Exp<br>(Coef) | Lower<br>95% CI | Upper<br>95% CI | SE<br>(Coef) | Robust_SE | z-test | Pr(> z ) |
| Cut off 5 cm                       | 0.91  | 2.50          | 0.20            | 30.58           | 1.05         | 1.27      | 0.72   | 0.47     |
| Number of<br>Organs Infiltrated: 1 | 1.66  | 5.25          | 4.29            | 6.43            | 0.88         | 0.10      | 16.14  | <0.01    |
| Number of<br>Organs Infiltrated: 2 | 1.99  | 7.37          | 3.61            | 15.02           | 1.01         | 0.36      | 5.49   | <0.01    |
| Number of<br>Organs Infiltrated: 3 | 3.19  | 24.35         | 14.89           | 39.81           | 1.46         | 0.25      | 12.73  | <0.01    |
| pTNM: pT2                          | 0.61  | 1.85          | 0.58            | 5.82            | 1.21         | 0.58      | 1.05   | 0.29     |
| pTNM: pT3                          | 0.34  | 1.40          | 1.38            | 1.43            | 1.27         | 0.007     | 42.83  | <0.01    |
| Masaoka                            | -0.14 | 0.86          | 0.42            | 1.73            | 0.56         | 0.35      | -0.41  | 0.68     |

**Table S3:** Multivariate model for disease free survival in Thymomas.

|                                    | Coef                  | Exp<br>(Coef)        | Lower<br>95% CI      | Upper<br>95% CI      | SE (Coef)            | Robust-SE            | z-test  | Pr(> z ) |
|------------------------------------|-----------------------|----------------------|----------------------|----------------------|----------------------|----------------------|---------|----------|
| Continuous variable                | -1.01e <sup>-01</sup> | 9.04e <sup>-01</sup> | 8.44e <sup>-01</sup> | 9.67e <sup>-01</sup> | 7.21e <sup>-02</sup> | 3.48e <sup>-2</sup>  | -2.91   | <0.01    |
| Number of<br>Organs Infiltrated: 1 | 9.73e <sup>-01</sup>  | 2.65E                | 1.37                 | 5.12                 | 5.43e <sup>-01</sup> | 3.37e <sup>-01</sup> | 2.88    | <0.01    |
| Number of<br>Organs Infiltrated: 2 | 3.13e <sup>-01</sup>  | 1.37                 | 7.93e <sup>-01</sup> | 2.36                 | 7.41e <sup>-01</sup> | 2.78e <sup>-01</sup> | 1.12    | 0.25     |
| Number of<br>Organs Infiltrated: 3 | -15.10                | 2.65e <sup>-07</sup> | 5.98e <sup>-08</sup> | 1.18e <sup>-06</sup> | 4.14e <sup>+03</sup> | 7.60e <sup>-01</sup> | -19.91  | <0.01    |
| Masaoka                            | 2.10e <sup>-01</sup>  | 1.23                 | 5.74e <sup>-01</sup> | 2.65                 | 3.07e <sup>-01</sup> | 3.91e <sup>-01</sup> | 0.53    | 0.59     |
|                                    |                       |                      |                      |                      |                      |                      |         |          |
|                                    | Coef                  | Exp<br>(Coef)        | Lower<br>95% CI      | Upper<br>95% CI      | SE (Coef)            | Robust-SE            | z-test  | Pr(> z ) |
| Cut off 5 cm                       | -1.44e <sup>-01</sup> | 8.66e <sup>-01</sup> | 8.11e <sup>-01</sup> | 9.24e <sup>-01</sup> | 3.45e <sup>-01</sup> | 3.32e <sup>-02</sup> | -4.33   | <0.01    |
| Number of<br>Organs Infiltrated: 1 | 9.79e <sup>-01</sup>  | 2.66                 | 1.34                 | 5.31                 | 5.51e <sup>-01</sup> | 3.52e <sup>-02</sup> | 2.78    | <0.01    |
| Number of<br>Organs Infiltrated: 2 | 3.12e <sup>-01</sup>  | 1.37                 | 7.60e <sup>-01</sup> | 2.46                 | 7.44e <sup>-01</sup> | 2.99e <sup>-01</sup> | 1.04    | 0.29     |
| Number of<br>Organs Infiltrated: 3 | -15.40                | 2.09e <sup>-07</sup> | 4.40e <sup>-08</sup> | 9.97e <sup>-07</sup> | 4.15e <sup>+03</sup> | 7.96e <sup>-01</sup> | -19.31  | <0.01    |
| Masaoka                            | 1.82e <sup>-01</sup>  | 1.20                 | 5.58e <sup>-01</sup> | 2.58                 | 3.10e <sup>-01</sup> | 3.90e <sup>-01</sup> | 0.46    | 0.64     |
|                                    |                       |                      |                      |                      |                      |                      |         |          |
|                                    | Coef                  | Exp<br>(Coef)        | Lower<br>95% CI      | Upper<br>95% CI      | SE (Coef)            | Robust SE            | z-test  | Pr(> z ) |
| Cut off 3 cm                       | -6.28e <sup>-01</sup> | 5.34e <sup>-01</sup> | 5.29e <sup>-01</sup> | 5.39e <sup>-01</sup> | 4.03E-01             | 4.81e <sup>-03</sup> | -130.63 | <0.01    |
| Number of<br>Organs Infiltrated: 1 | 8.47e <sup>-01</sup>  | 2.33                 | 1.19                 | 4.59                 | 5.55E-01             | 3.45e <sup>-01</sup> | 2.45    | 0.01     |
| Number of<br>Organs Infiltrated: 2 | 2.98e <sup>-01</sup>  | 1.35                 | 7.26e <sup>-01</sup> | 2.50                 | 7.53E-01             | 3.16e <sup>-01</sup> | 0.94    | 0.34     |
| Number of<br>Organs Infiltrated: 3 | -1.55                 | 1.84e <sup>-07</sup> | 3.83e <sup>-08</sup> | 8.83e <sup>-07</sup> | 4.20E+03             | 8.01e <sup>-01</sup> | -19.36  | <0.01    |
| Masaoka                            | 2.56e <sup>-01</sup>  | 1.29                 | 6.09e <sup>-01</sup> | 2.74                 | 3.18E-01             | 3.84e <sup>-01</sup> | 0.66    | 0.51     |

**Table S4:** Multivariate model for overall survival in Thymomas.

|                                            | Coef                   | Exp<br>(Coef)         | Lower<br>95% CI       | Upper<br>95% CI       | SE (Coef)             | Robust-SE             | z-test | Pr(> z )        |
|--------------------------------------------|------------------------|-----------------------|-----------------------|-----------------------|-----------------------|-----------------------|--------|-----------------|
| <b>Continuous variable</b>                 | -1.37 e <sup>-01</sup> | 8.71 e <sup>-01</sup> | 7.53 e <sup>-01</sup> | 1.00                  | 1.31 e <sup>-01</sup> | 7.44 e <sup>-02</sup> | -1.84  | 0.06            |
| <b>Number of<br/>Organs Infiltrated: 1</b> | 1.62 e <sup>+01</sup>  | 9.21 e <sup>-08</sup> | 2.21 e <sup>-08</sup> | 3.82 e <sup>-07</sup> | 2.08 e <sup>+04</sup> | 7.26 e <sup>-01</sup> | -22.29 | <b>&lt;0.01</b> |
| <b>Number of<br/>Organs Infiltrated: 2</b> | -1.61 e <sup>+01</sup> | 1.05 e <sup>-07</sup> | 1.60 e <sup>-08</sup> | 6.89 e <sup>-07</sup> | 1.33 e <sup>+04</sup> | 9.59 e <sup>-01</sup> | -16.74 | <b>&lt;0.01</b> |
|                                            |                        |                       |                       |                       |                       |                       |        |                 |
| <b>cut-off 5 cm</b>                        | -1.92 e <sup>-01</sup> | 8.25 e <sup>-01</sup> | 3.73 e <sup>-01</sup> | 1.82                  | 6.54 e <sup>-01</sup> | 4.04 e <sup>-01</sup> | -0.47  | 0.63            |
| <b>Number of<br/>Organs Infiltrated: 1</b> | -1.61 e <sup>+01</sup> | 9.92 e <sup>-08</sup> | 2.47 e <sup>-08</sup> | 3.97 e <sup>-07</sup> | 2.04 e <sup>+04</sup> | 7.07 e <sup>-01</sup> | -22.78 | <b>&lt;0.01</b> |
| <b>Number of<br/>Organs Infiltrated: 2</b> | -1.61 e <sup>+01</sup> | 9.96 e <sup>-08</sup> | 1.94 e <sup>-08</sup> | 5.10 e <sup>-07</sup> | 1.31 e <sup>+04</sup> | 8.33 e <sup>-01</sup> | -19.34 | <b>&lt;0.01</b> |
|                                            |                        |                       |                       |                       |                       |                       |        |                 |
| <b>cut-off 3 cm</b>                        | -6.14 e <sup>-01</sup> | 5.41 e <sup>-01</sup> | 2.35 e <sup>-01</sup> | 1.24                  | 7.01 e <sup>-01</sup> | 4.24 e <sup>-01</sup> | -1.44  | 0.14            |
| <b>Number of<br/>Organs Infiltrated: 1</b> | -1.48 e <sup>+01</sup> | 3.40 e <sup>-07</sup> | 7.07 e <sup>-08</sup> | 1.63 e <sup>-06</sup> | 1.27 e <sup>+04</sup> | 8.01 e <sup>-01</sup> | -18.58 | <b>&lt;0.01</b> |
| <b>Number of<br/>Organs Infiltrated: 2</b> | -1.49 e <sup>+01</sup> | 3.37 e <sup>-07</sup> | 4.33 e <sup>-08</sup> | 2.62 e <sup>-06</sup> | 8.11 e <sup>+03</sup> | 1.04                  | -14.24 | <b>&lt;0.01</b> |

**Table S5:** Multivariate model for overall survival in Masaoka I.
