# Supplementary material for: Unsolved Issues in Thymic Epithelial Tumour Stage Classification: The Role of Tumour Dimension
Source: MDPI journal article supplement (doi:10.3390/diagnostics13223468), 2023-11-17
Supplement: s1 [file s1]

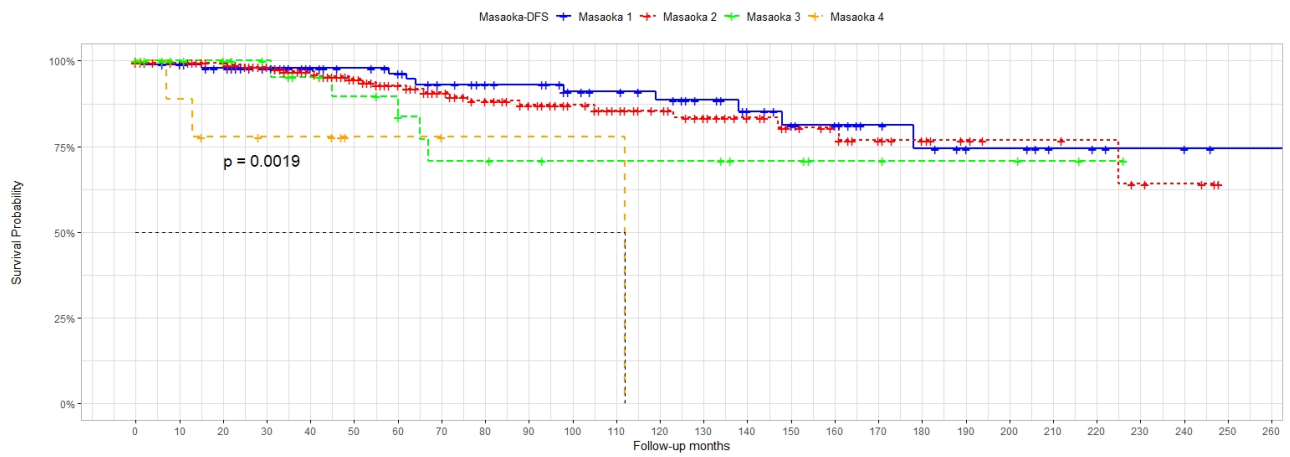

A

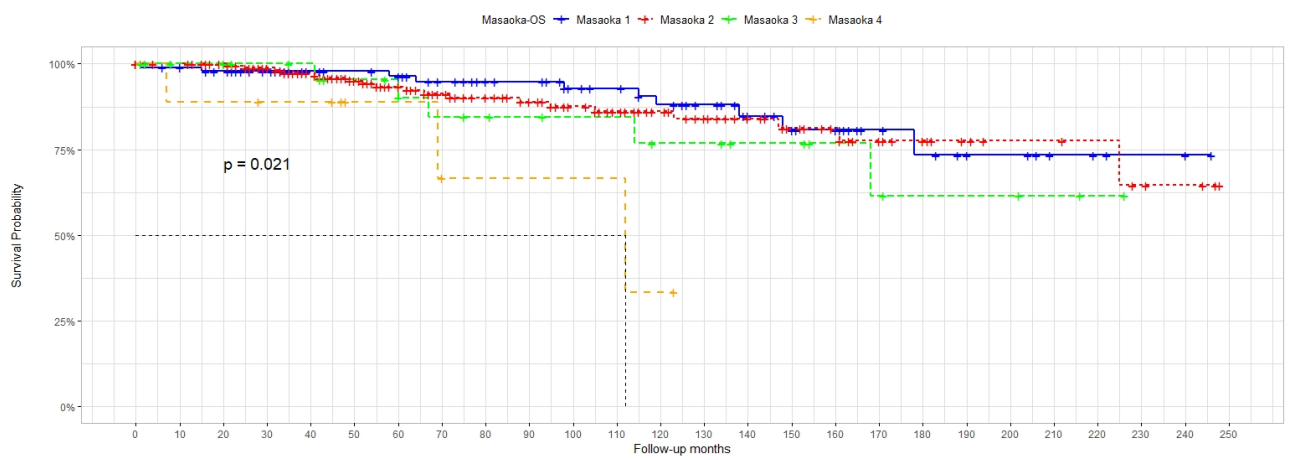

B

**Figure S1** Disease free survival (A) and overall survival (B) according to Masaoka-Koga staging system

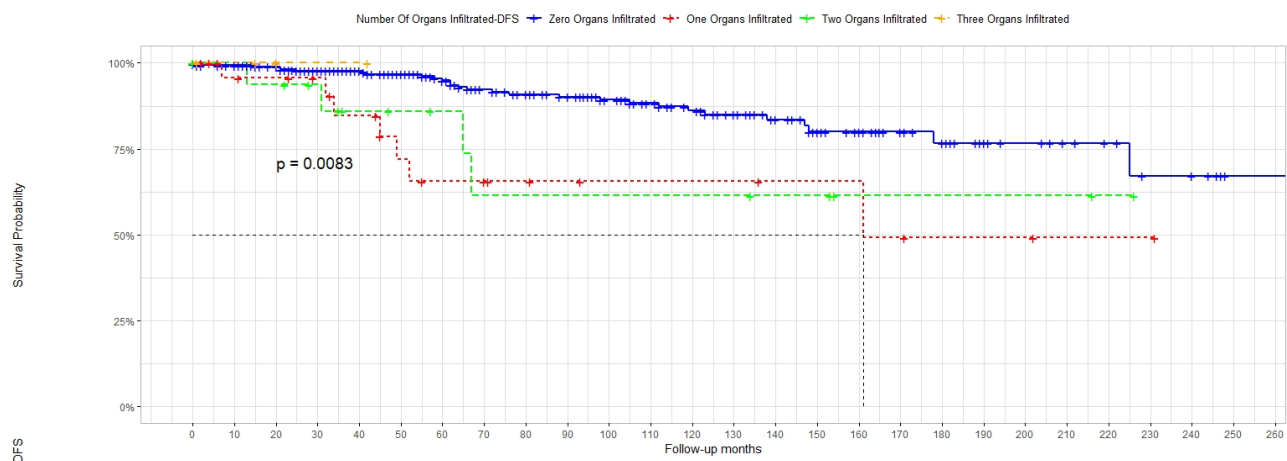

A

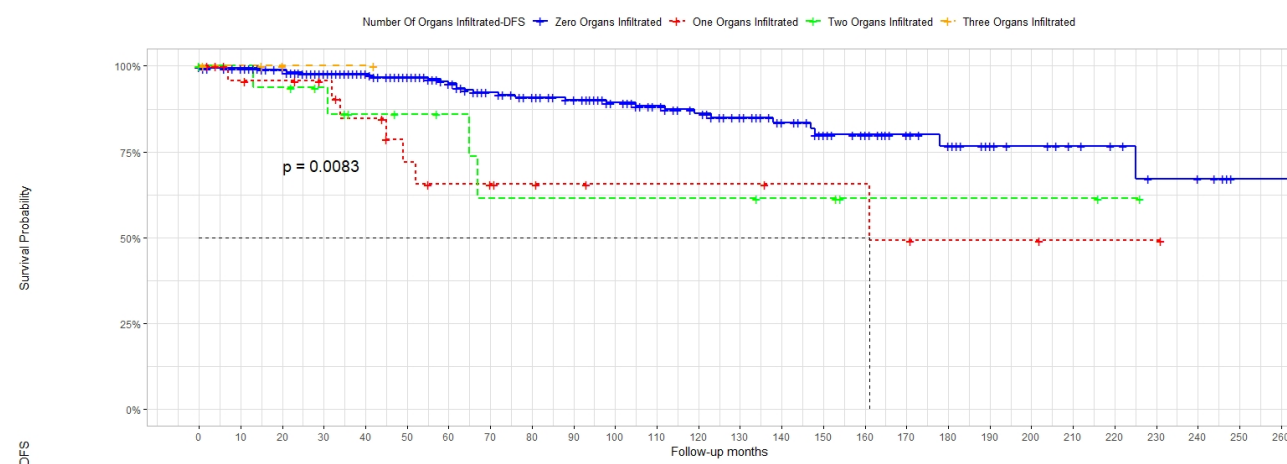

B

**Figure S2** Disease free survival (A) and overall survival (B) according to the number of infiltrated organs

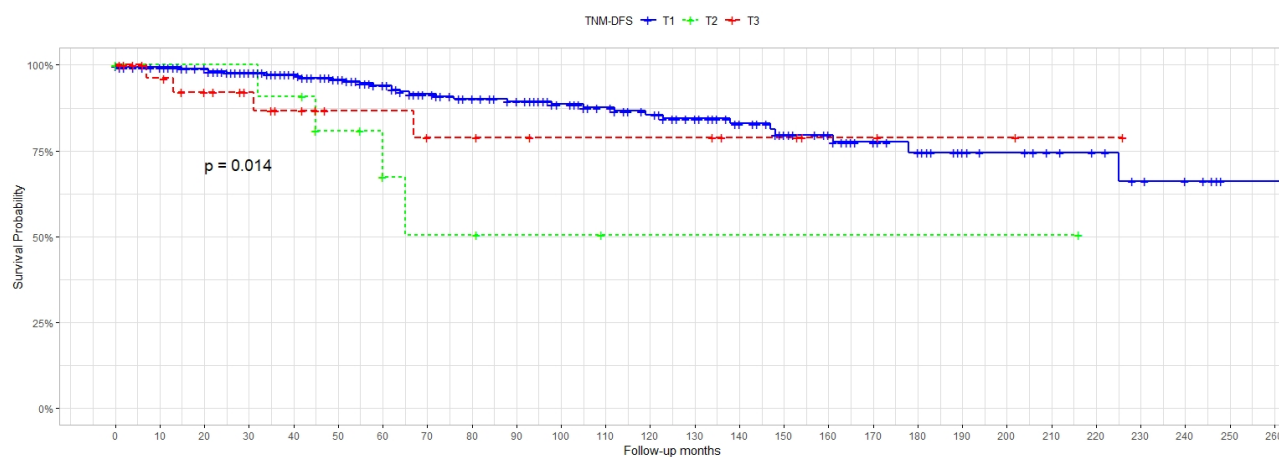

A

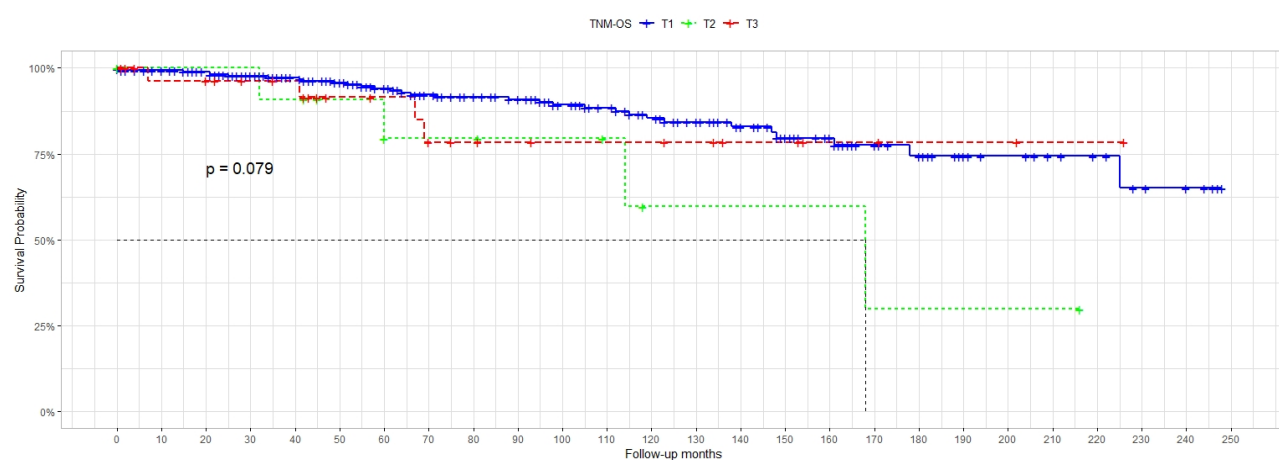

B

**Figure S3** Disease free survival (A) and overall survival (B) according to the TNM staging system
